# Supplementary material for: Rotational spectra and semi-experimental structures of furonitrile and its water cluster
Source: Royal Society of Chemistry journal article supplement (doi:10.1039/d3cp03984f), 2023-01-01
Supplement: d3cp03984f1.pdf [file d3cp03984f1.pdf]

Electronic Supplementary Information for:  
Rotational spectra and semi-experimental structures of  
furonitrile and its water cluster

Mattia Melosso,<sup>a,\*</sup> Silvia Alessandrini,<sup>a</sup> Lorenzo Spada,<sup>b,†,\*</sup> Alessio Melli,<sup>a,b</sup>  
Xiujuan Wang,<sup>c</sup> Yang Zheng,<sup>c</sup> Chunguo Duan,<sup>c</sup> Jiayi Li,<sup>c</sup> Weiping Du,<sup>c</sup>  
Qian Gou,<sup>c,\*</sup> Luca Bizzocchi,<sup>a</sup> Luca Dore,<sup>a</sup> Vincenzo Barone,<sup>b</sup> and Cristina Puzzarini<sup>a</sup>

October 16, 2023

# 1 Isotopologues of 2- and 3-furonitrile

Table S1: Experimental ground state rotational constants of the  $^{13}\text{C}$ ,  $^{15}\text{N}$ , and  $^{18}\text{O}$ -substituted isotopologues of 2- and 3-furonitrile.

| <b>2-furonitrile</b> |                  |                  |                  |                  |                  |                 |                 |
|----------------------|------------------|------------------|------------------|------------------|------------------|-----------------|-----------------|
| Parameter            | $^{13}\text{C7}$ | $^{13}\text{C9}$ | $^{13}\text{C4}$ | $^{13}\text{C3}$ | $^{13}\text{C2}$ | $^{15}\text{N}$ | $^{18}\text{O}$ |
| <i>A</i>             | 9137.5856(6)     | 9154.0081(6)     | 8991.4613(6)     | 9218.5138(8)     | 9220.0281(6)     | 9220.2631(5)    | 8866.490(1)     |
| <i>B</i>             | 2004.8248(1)     | 2000.4705(1)     | 2026.6066(1)     | 2028.7908(1)     | 2006.6066(1)     | 1966.4099(1)    | 2026.3543(2)    |
| <i>C</i>             | 1643.5398(1)     | 1641.1426(1)     | 1653.2629(1)     | 1662.2688(1)     | 1647.3915(1)     | 1620.1953(1)    | 1648.8163(1)    |
| Lines                | 56               | 56               | 56               | 50               | 56               | 17              | 47              |
| rms                  | 1.6              | 1.7              | 1.6              | 1.3              | 1.5              | 0.6             | 1.3             |
| <b>3-furonitrile</b> |                  |                  |                  |                  |                  |                 |                 |
| Parameter            | $^{13}\text{C7}$ | $^{13}\text{C4}$ | $^{13}\text{C3}$ | $^{13}\text{C5}$ | $^{13}\text{C2}$ | $^{15}\text{N}$ | $^{18}\text{O}$ |
| <i>A</i>             | 9218.0154(8)     | 9068.0384(8)     | 9296.84(3)       | 9106.2285(8)     | 9296.5039(8)     | 9296.561(2)     | 9149.64(4)      |
| <i>B</i>             | 1916.7287(1)     | 1938.2414(1)     | 1939.5560(1)     | 1938.5122(1)     | 1917.8572(1)     | 1880.0222(2)    | 1894.4775(1)    |
| <i>C</i>             | 1586.1899(1)     | 1596.29798(9)    | 1604.1607(1)     | 1597.66410(9)    | 1589.27546(9)    | 1563.1955(2)    | 1568.9249(1)    |
| No. of lines         | 77               | 77               | 66               | 77               | 76               | 18              | 54              |
| rms error            | 2.6              | 1.9              | 1.4              | 2.2              | 1.9              | 1.1             | 2.4             |

**Notes:** Rotational constants are given in MHz, while the rms error is expressed in kHz. Values in parentheses are one times the standard error in unit of the last quoted digits. Centrifugal distortion terms and nuclear quadrupole coupling constants used in the fit were kept fixed to the values obtained for the corresponding main species (see Table 1 of the main text).

## 2 Furonitrile-water complexes

### 2.1 Conformers found within $1000\text{ cm}^{-1}$

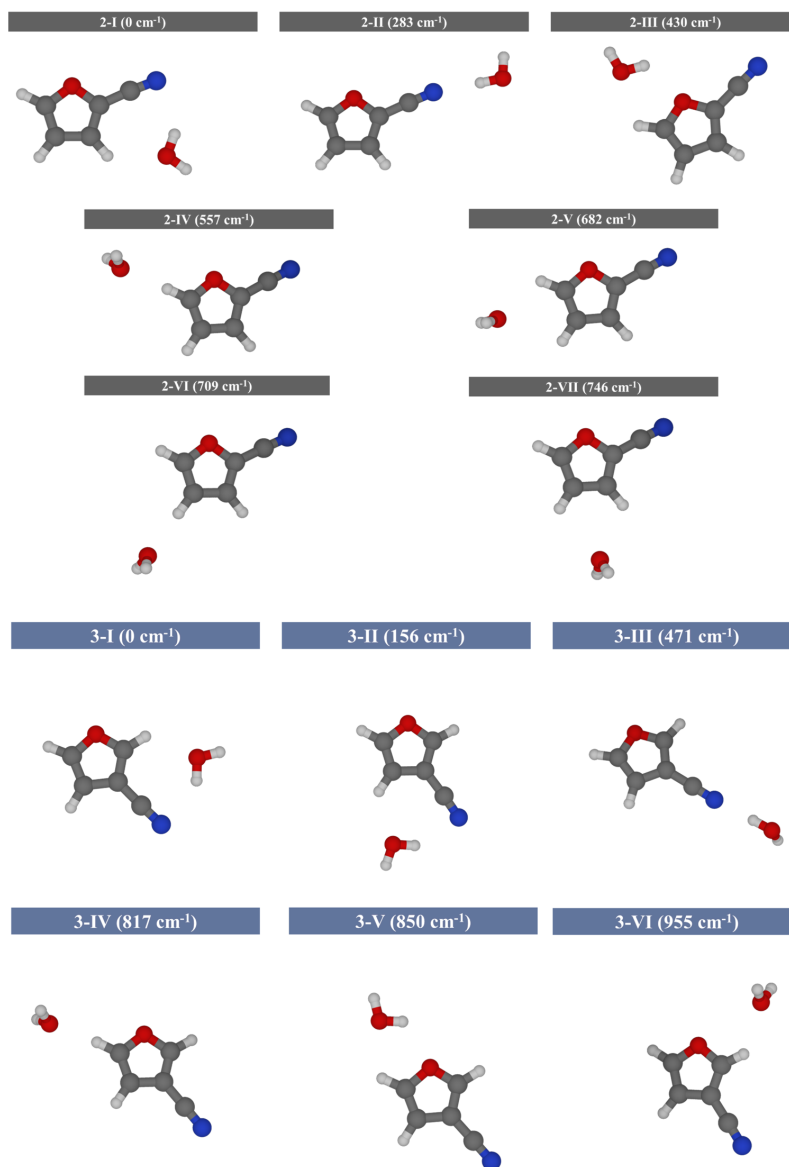

Figure S1: Geometry of the thirteen isomers of the furonitrile-water complex lying within  $1000\text{ cm}^{-1}$ . Energies are calculated at the B3LYP-D3BJ/6-311G++(d,p) level of theory.

## 2.2 Results of the spectral analysis

Table S2: Spectroscopic constants derived for several isotopologues of conformer **2-I**.

| Parameter                   | Unit | $\text{H}_2^{18}\text{O}$ |               | $\text{D}_2\text{O}$ | HDO          | DOH          |
|-----------------------------|------|---------------------------|---------------|----------------------|--------------|--------------|
|                             |      | 0                         | 1             |                      |              |              |
| $A$                         | MHz  | 3383.6060(4)              | 3383.1436(4)  | 3408.163(2)          | 3399.5116(5) | 3473.019(3)  |
| $B$                         | MHz  | 1267.72874(9)             | 1267.68371(9) | 1248.1882(2)         | 1277.6849(2) | 1289.8220(4) |
| $C$                         | MHz  | 922.38944(7)              | 922.39917(7)  | 914.0152(3)          | 929.0429(2)  | 940.8077(2)  |
| $D_J$                       | kHz  |                           | 0.5603        | 0.537(3)             | 0.549(2)     | 0.5603       |
| $D_{JK}$                    | kHz  |                           | -1.409        | -1.409               | -1.409       | -1.409       |
| $D_K$                       | kHz  |                           | 13.27         | 13.27                | 13.27        | 13.27        |
| $d_1$                       | kHz  |                           | -0.1957       | -0.1957              | -0.1957      | -0.1957      |
| $d_2$                       | kHz  |                           | -0.0204       | -0.0204              | -0.0204      | -0.0204      |
| $3/2 \times \chi_{aa}$      | MHz  |                           | -3.12(1)      | -3.52(8)             | -3.21(2)     | -2.7(1)      |
| $(\chi_{bb} - \chi_{cc})/4$ | MHz  |                           | -0.243(2)     | -0.238(7)            | -0.235(3)    | -0.1975      |
| No. of lines                |      |                           | 155           | 45                   | 67           | 25           |
| rms error                   | kHz  |                           | 3.1           | 3.6                  | 3.3          | 3.9          |

**Notes:** Numbers in parentheses represent the standard error in unit of the last quoted digit. Parameters without error are kept fixed to the corresponding parent species values.

Table S3: Spectroscopic constants derived for several isotopologues of conformer **2-II**.

| Parameter                   | Unit | $\text{H}_2^{18}\text{O}$ |             | $\text{D}_2\text{O}$ | HDO       | DOH         |
|-----------------------------|------|---------------------------|-------------|----------------------|-----------|-------------|
|                             |      | 0                         | 1           |                      |           |             |
| $A$                         | MHz  | 9013.(1)                  | 9004.4(9)   | 8892.(1)             | 8509(55)  | 9021.6(5)   |
| $B$                         | MHz  | 620.8781(2)               | 620.9090(2) | 625.5731(2)          | 637.32(1) | 647.0573(1) |
| $C$                         | MHz  | 580.9773(2)               | 581.0107(2) | 584.9619(2)          | 595.17(1) | 603.9141(1) |
| $D_J$                       | kHz  |                           | 0.139(1)    | 0.1257(8)            | 0.1482    | 0.1314(5)   |
| $D_{JK}$                    | kHz  |                           | 9.22(2)     | 8.03(4)              | 10.185    | 9.61(2)     |
| $d_1$                       | kHz  |                           | -0.0169     | -0.0169              | -0.0169   | -0.0169     |
| $d_2$                       | kHz  |                           | -0.0069     | -0.0069              | -0.0069   | -0.0069     |
| $3/2 \times \chi_{aa}$      | MHz  |                           | -5.98       | -5.98                | -5.98     | -5.98       |
| $(\chi_{bb} - \chi_{cc})/4$ | MHz  |                           | 0.26        | 0.26                 | 0.26      | 0.26        |
| No. of lines                |      |                           | 78          | 51                   | 31        | 57          |
| rms error                   | kHz  |                           | 3.4         | 3.1                  | 318       | 2.7         |

**Notes:** Numbers in parentheses represent the standard error in unit of the last quoted digit. Parameters without error are kept fixed to the corresponding parent species values.

Table S4: Spectroscopic constants derived for several isotopologues of conformer **3-I**.

| Parameter                   | Unit | $\text{H}_2^{18}\text{O}$ |              | $\text{D}_2\text{O}$ |              | HDO          | DOH          |
|-----------------------------|------|---------------------------|--------------|----------------------|--------------|--------------|--------------|
|                             |      | 0                         | 1            | 0                    | 1            |              |              |
| $A$                         | MHz  | 3299.1586(3)              | 3298.9285(3) | 3318.730(2)          | 3318.691(2)  | 3313.237(2)  | 3392.638(2)  |
| $B$                         | MHz  | 1286.9907(1)              | 1286.9760(1) | 1267.0764(3)         | 1267.0768(3) | 1295.8606(2) | 1306.1382(4) |
| $C$                         | MHz  | 925.96986(7)              | 925.97432(7) | 917.3233(2)          | 917.3234(2)  | 931.8422(1)  | 943.2819(2)  |
| $D_J$                       | kHz  | 0.419                     |              | 0.409(3)             |              | 0.419        | 0.419        |
| $D_{JK}$                    | kHz  | -0.54                     |              | -0.54                |              | -0.54        | -0.54        |
| $D_K$                       | kHz  | 9.97                      |              | 9.97                 |              | 9.97         | 9.97         |
| $d_1$                       | kHz  | -0.144                    |              | -0.144               |              | -0.144       | -0.144       |
| $d_2$                       | kHz  | -0.016                    |              | -0.016               |              | -0.016       | -0.016       |
| $3/2 \times \chi_{aa}$      | MHz  | -3.824(9)                 |              | -4.01(3)             |              | -3.96(2)     | -4.00(5)     |
| $(\chi_{bb} - \chi_{cc})/4$ | MHz  | -0.208(1)                 |              | -0.165               |              | -0.172(8)    | -0.165       |
| $ \chi_{ab} $               | MHz  | 2.1                       |              | 2.1                  |              | 2.1          | 2.1          |
| No. of lines                |      | 116                       |              | 98                   |              | 58           | 47           |
| rms error                   | kHz  | 2.8                       |              | 4.8                  |              | 5.0          | 5.0          |

**Notes:** Numbers in parentheses represent the standard error in unit of the last quoted digit. Parameters without error are kept fixed to the corresponding parent species values.

 Table S5: Spectroscopic constants derived for several isotopologues of conformer **3-II**.

| Parameter                   | Unit | $\text{H}_2^{18}\text{O}$ |              | $\text{D}_2\text{O}$ | HDO          | DOH          |
|-----------------------------|------|---------------------------|--------------|----------------------|--------------|--------------|
|                             |      | 0                         | 1            |                      |              |              |
| $A$                         | MHz  | 3392.98(2)                | 3392.92(2)   | 3416.689(3)          | 3409.8389(6) | 3485.958(4)  |
| $B$                         | MHz  | 1231.8853(4)              | 1231.8641(4) | 1213.7438(4)         | 1241.2381(3) | 1252.6256(4) |
| $C$                         | MHz  | 904.0070(3)               | 904.0130(3)  | 896.0291(3)          | 910.4031(1)  | 921.8110(2)  |
| $D_J$                       | kHz  | 0.494                     |              | 0.494                | 0.494        | 0.494        |
| $D_{JK}$                    | kHz  | -1.10                     |              | -1.10                | -1.10        | -1.10        |
| $D_K$                       | kHz  | 11.79                     |              | 11.79                | 11.79        | 9.8(8)       |
| $d_1$                       | kHz  | -0.169                    |              | -0.169               | -0.169       | -0.169       |
| $d_2$                       | kHz  | -0.015                    |              | -0.015               | -0.015       | -0.015       |
| $3/2 \times \chi_{aa}$      | MHz  | -3.68(4)                  |              | -3.940               | -3.86(3)     | -3.940       |
| $(\chi_{bb} - \chi_{cc})/4$ | MHz  | -0.204                    |              | -0.204               | -0.204       | -0.204       |
| $ \chi_{ab} $               | MHz  | 2.6                       |              | 2.6                  | 2.6          | 2.6          |
| No. of lines                |      | 53                        |              | 37                   | 46           | 34           |
| rms error                   | kHz  | 4.5                       |              | 6.1                  | 4.6          | 4.5          |

**Notes:** Numbers in parentheses represent the standard error in unit of the last quoted digit. Parameters without error are kept fixed to the corresponding parent species values.

## 2.3 Calculations relevant for the structure determination

Table S6: revDSD equilibrium structures for 2- and 3-furonitrile.

| 2-furonitrile            |           | 3-furonitrile            |           |
|--------------------------|-----------|--------------------------|-----------|
| Parameter                | revDSD    | Parameter                | revDSD    |
| $r(\text{N1C2})$         | 1.16333   | $r(\text{N1C2})$         | 1.16284   |
| $r(\text{C2C3})$         | 1.41801   | $r(\text{C2C3})$         | 1.42190   |
| $r(\text{C3C4})$         | 1.3656    | $r(\text{C3C4})$         | 1.43927   |
| $r(\text{C3O5})$         | 1.36492   | $r(\text{C3C5})$         | 1.36568   |
| $r(\text{H6C4})$         | 1.07754   | $r(\text{C4H6})$         | 1.07700   |
| $r(\text{C7O5})$         | 1.35786   | $r(\text{C4C7})$         | 1.35553   |
| $r(\text{H8C7})$         | 1.0765    | $r(\text{C7H8})$         | 1.07600   |
| $r(\text{C9C7})$         | 1.36158   | $r(\text{C7O9})$         | 1.36588   |
| $r(\text{C9H10})$        | 1.07732   | $r(\text{H10C5})$        | 1.07636   |
| $\angle(\text{C3C2N1})$  | 181.40185 | $\angle(\text{N1C2C3})$  | 179.30149 |
| $\angle(\text{C4C2C2})$  | 131.80329 | $\angle(\text{C4C3C2})$  | 127.4006  |
| $\angle(\text{O5C3C2})$  | 110.69814 | $\angle(\text{C5C3C2})$  | 126.27422 |
| $\angle(\text{H6C4C3})$  | 125.88758 | $\angle(\text{H6C4C3})$  | 127.0532  |
| $\angle(\text{C7O5C3})$  | 106.11755 | $\angle(\text{C7C4C3})$  | 105.57092 |
| $\angle(\text{H8C7O5})$  | 115.52447 | $\angle(\text{H8C7C4})$  | 133.4647  |
| $\angle(\text{C9C7O5})$  | 111.09916 | $\angle(\text{O9C7C4})$  | 110.70528 |
| $\angle(\text{H10C9C4})$ | 127.49681 | $\angle(\text{H10C5O9})$ | 117.03    |

**Notes:** Bond lengths are given in Å, angles in degrees.

Table S7: revDSD equilibrium structures for the **2-I** and **2-II** complexes together with the templated structures.

| Parameter                             | <b>2-I</b> |           | Parameter                                        | <b>2-II</b> |           |
|---------------------------------------|------------|-----------|--------------------------------------------------|-------------|-----------|
|                                       | revDSD     | revDSD+TM |                                                  | revDSD      | revDSD+TM |
| $r(\text{N1C2})$                      | 1.16384    | 1.15917   | $r(\text{N1C2})$                                 | 1.16174     | 1.15707   |
| $r(\text{C2C3})$                      | 1.41672    | 1.41598   | $r(\text{C2C3})$                                 | 1.41685     | 1.41685   |
| $\angle(\text{C3C2N1})$               | 183.49949  | 182.38603 | $\angle(\text{C3C2N1})$                          | 181.5222    | 181.5222  |
| $r(\text{C3C4})$                      | 1.36548    | 1.36214   | $r(\text{C3C4})$                                 | 1.36583     | 1.36583   |
| $\angle(\text{C4C3C2})$               | 130.83427  | 130.09349 | $\angle(\text{C4C3C2})$                          | 131.67932   | 131.67932 |
| $r(\text{C3O5})$                      | 1.36533    | 1.35946   | $r(\text{C3O5})$                                 | 1.36441     | 1.36441   |
| $\angle(\text{O5C3C4})$               | 111.11122  | 111.34571 | $\angle(\text{O5C3C4})$                          | 110.81174   | 110.81174 |
| $r(\text{H6C4})$                      | 1.07814    | 1.07526   | $r(\text{H6C4})$                                 | 1.07761     | 1.07761   |
| $\angle(\text{H6C4C3})$               | 125.00262  | 125.04152 | $\angle(\text{H6C4C3})$                          | 125.93699   | 125.93699 |
| $r(\text{C7O5})$                      | 1.35819    | 1.35479   | $r(\text{C7O5})$                                 | 1.35756     | 1.35756   |
| $\angle(\text{C7O5C3})$               | 106.04441  | 106.16774 | $\angle(\text{C7O5C3})$                          | 106.25678   | 106.25678 |
| $r(\text{H8C7})$                      | 1.07657    | 1.07380   | $r(\text{H8C7})$                                 | 1.07654     | 1.07654   |
| $\angle(\text{H8C7O5})$               | 115.55416  | 115.68143 | $\angle(\text{H8C7O5})$                          | 115.58702   | 115.58702 |
| $r(\text{C9C7})$                      | 1.36221    | 1.35779   | $r(\text{C9C7})$                                 | 1.36193     | 1.36193   |
| $\angle(\text{C9C7O5})$               | 110.99726  | 110.96812 | $\angle(\text{C9C7O5})$                          | 110.98042   | 110.98042 |
| $r(\text{C9H10})$                     | 1.07742    | 1.07449   | $r(\text{C9H10})$                                | 1.07727     | 1.07727   |
| $\angle(\text{H10C9C4})$              | 127.39163  | 127.36443 | $\angle(\text{H10C9C4})$                         | 127.41562   | 127.41562 |
| $r(\text{H}_a \cdots \text{N})$       | 2.36168    | 2.36168   | $r(\text{H}_a \cdots \text{N1})$                 | 2.08165     | 2.08165   |
| $r(\text{OH}_a)$                      | 0.96423    | 0.96423   | $r(\text{OH}_a)$                                 | 0.96657     | 0.96657   |
| $r(\text{H}_b\text{O})$               | 0.96071    | 0.95693   | $r(\text{H}_b\text{O})$                          | 0.96019     | 0.95641   |
| $\angle(\text{CN} \cdots \text{H})$   | 87.32051   | 87.32051  | $\angle(\text{C2N1} \cdots \text{H}_a)$          | 171.00147   | 171.00147 |
| $\angle(\text{OH}_a \cdots \text{N})$ | 142.84843  | 142.84843 | $\angle(\text{OH}_a \cdots \text{N1})$           | 176.78183   | 176.78183 |
| $\angle(\text{H}_a\text{OH}_b)$       | 104.9118   | 104.98389 | $\angle(\text{H}_a\text{OH}_b)$                  | 104.35183   | 104.42392 |
|                                       |            |           | $\theta(\text{OH}_a \cdots \text{N1C2})$         | 4.604       | 4.604     |
|                                       |            |           | $\theta(\text{H}_b\text{OH}_a \cdots \text{N1})$ | 173.839     | 173.839   |

**Notes:** Bond lengths are given in Å, angles in degrees. If not otherwise stated, all dihedral angles are fixed to 0° or 180°.

Table S8: RevDSD equilibrium structures for the **3-I** and **3-II** complexes together with the templated structures.

| Parameter                               | <b>3-I</b> |           | Parameter                               | <b>3-II</b> |           |
|-----------------------------------------|------------|-----------|-----------------------------------------|-------------|-----------|
|                                         | revDSD     | revDSD+TM |                                         | revDSD      | revDSD+TM |
| $r(\text{C5O9})$                        | 1.34996    | 1.34712   | $r(\text{C5O9})$                        | 1.34926     | 1.34642   |
| $r(\text{O9C7})$                        | 1.36645    | 1.36342   | $r(\text{O9C7})$                        | 1.36881     | 1.36578   |
| $\angle(\text{C7O9C5})$                 | 107.43189  | 107.32463 | $\angle(\text{C7O9C5})$                 | 107.22199   | 107.11473 |
| $r(\text{C5C3})$                        | 1.36685    | 1.36196   | $r(\text{C5C3})$                        | 1.36577     | 1.36088   |
| $\angle(\text{C3C5O9})$                 | 109.84406  | 109.90552 | $\angle(\text{C3C5O9})$                 | 109.99146   | 110.05292 |
| $r(\text{C7C4})$                        | 1.35561    | 1.35166   | $r(\text{C7C4})$                        | 1.35494     | 1.35100   |
| $\angle(\text{C4C7O9})$                 | 110.71156  | 110.81807 | $\angle(\text{C4C7O9})$                 | 110.86218   | 110.96869 |
| $r(\text{C5H10})$                       | 1.07692    | 1.07425   | $r(\text{C5H10})$                       | 1.07643     | 1.07376   |
| $\angle(\text{H10C5O9})$                | 118.28938  | 118.36613 | $\angle(\text{H10C5O9})$                | 117.06306   | 117.13981 |
| $r(\text{H8C7})$                        | 1.07598    | 1.07315   | $r(\text{H8C7})$                        | 1.07597     | 1.07314   |
| $\angle(\text{H8C7O9})$                 | 115.86981  | 115.87887 | $\angle(\text{H8C7O9})$                 | 115.64906   | 115.65812 |
| $r(\text{H6C4})$                        | 1.07701    | 1.07416   | $r(\text{H6C4})$                        | 1.07766     | 1.07481   |
| $\angle(\text{H6C4C7})$                 | 127.33004  | 127.39629 | $\angle(\text{H6C4C7})$                 | 128.74889   | 128.81514 |
| $r(\text{C2C3})$                        | 1.41990    | 1.41904   | $r(\text{C2C3})$                        | 1.42009     | 1.41923   |
| $\angle(\text{C3C2C5})$                 | 125.12271  | 125.08344 | $\angle(\text{C3C2C5})$                 | 126.92883   | 126.88956 |
| $r(\text{N1C2})$                        | 1.16350    | 1.15879   | $r(\text{N1C2})$                        | 1.16337     | 1.06696   |
| $\angle(\text{N1C2C3})$                 | 178.42084  | 178.30470 | $\angle(\text{N1C2C3})$                 | 182.76276   | 182.87889 |
| $r(\text{N1C2})$                        | 1.16350    | 1.15879   | $r(\text{N1C2})$                        | 1.16337     | 1.06696   |
| $r(\text{H}_a \cdots \text{N1})$        | 2.33705    | 2.33705   | $r(\text{H}_a \cdots \text{N1})$        | 2.31366     | 2.31366   |
| $\angle(\text{C2N1} \cdots \text{H}_a)$ | 86.08448   | 86.08448  | $\angle(\text{C2N1} \cdots \text{H}_a)$ | 0.96474     | 0.96474   |
| $r(\text{OH}_a)$                        | 0.96479    | 0.96479   | $r(\text{OH}_a)$                        | 0.96064     | 0.96064   |
| $\angle(\text{OH}_a \cdots \text{N1})$  | 144.10859  | 144.10859 | $\angle(\text{OH}_a \cdots \text{N1})$  | 88.15559    | 88.15559  |
| $r(\text{H}_b\text{O})$                 | 0.96062    | 0.95683   | $r(\text{H}_b\text{O})$                 | 145.64094   | 145.63715 |
| $\angle(\text{H}_a\text{OH}_b)$         | 105.04544  | 105.11753 | $\angle(\text{H}_a\text{OH}_b)$         | 104.94176   | 105.01385 |

**Notes:** Bond lengths are given in Å, angles in degrees. If not otherwise stated, all dihedral angles are fixed to 0° or 180°.
